# Supplementary material for: Identification of New Therapeutic Targets for Gastric Cancer With Bioinformatics
Source: Front Genet. 2020 Aug 18;11:865. doi: 10.3389/fgene.2020.00865 (PMC7461879; doi:10.3389/fgene.2020.00865)
Supplement: Supplementary file 1 [file Table_1.XLSX]

## Sheet: 5FU IC50
Table S1 Sensitive (Green) and Drug-resistant (Red) cells of 5-Fluorouraci according to GDSC
Cell line	Cell line	TCGA classification	Tissue	Tissue sub-type	IC50	AUC
MKN7	1	STAD	digestive_system	stomach	3583.62	0.969282
NUGC4	2	STAD	digestive_system	stomach	2065.52	0.965555
Hs746T	3	STAD	digestive_system	stomach	1152.34	0.975446
RERFGC1B	4	STAD	digestive_system	stomach	1062.24	0.98693
GCIY	6	STAD	digestive_system	stomach	124.115	0.92907
NCIN87	7	STAD	digestive_system	stomach	118.781	0.896663
SNU1	8	STAD	digestive_system	stomach	86.9264	0.949747
NUGC3	9	STAD	digestive_system	stomach	71.7966	0.905834
IM95	10	STAD	digestive_system	stomach	50.8521	0.904621
AGS	11	STAD	digestive_system	stomach	46.6021	0.919674
OCUM1	12	STAD	digestive_system	stomach	38.0921	0.84792
FU97	13	STAD	digestive_system	stomach	36.7541	0.854192
HGC27	15	STAD	digestive_system	stomach	30.3188	0.903742
TGBC11TKB	17	STAD	digestive_system	stomach	29.5953	0.882017
MKN45	18	STAD	digestive_system	stomach	16.3807	0.810351
KATOIII	19	STAD	digestive_system	stomach	14.8973	0.776014
SNU16	20	STAD	digestive_system	stomach	14.3593	0.844341
2313287	22	STAD	digestive_system	stomach	8.74081	0.762547
SNU5	23	STAD	digestive_system	stomach	7.22624	0.753117

## Sheet: Ox IC50
Table S1 Sensitive (Green) and Drug-resistant (Red) cells of Oxaliplatin according to GDSC
Cell line		TCGA classification	Tissue	Tissue sub-type	IC50	AUC
Hs746T	1	STAD	digestive_system	stomach	774.572	0.974942
RERFGC1B	2	STAD	digestive_system	stomach	193.466	0.966946
HGC27	4	STAD	digestive_system	stomach	55.1283	0.956416
2313287	5	STAD	digestive_system	stomach	145.374	0.95565
GCIY	6	STAD	digestive_system	stomach	194.146	0.955332
SNU1	8	STAD	digestive_system	stomach	56.9226	0.948271
NUGC4	9	STAD	digestive_system	stomach	480.914	0.943434
KATOIII	10	STAD	digestive_system	stomach	252.94	0.941095
NUGC3	12	STAD	digestive_system	stomach	76.5681	0.924945
SNU5	13	STAD	digestive_system	stomach	42.8052	0.919433
OCUM1	14	STAD	digestive_system	stomach	100.42	0.914899
NCIN87	15	STAD	digestive_system	stomach	119.87	0.911
IM95	16	STAD	digestive_system	stomach	20.079	0.868325
AGS	17	STAD	digestive_system	stomach	8.38446	0.814826
MKN45	18	STAD	digestive_system	stomach	10.9008	0.803716

## Sheet: DEG-5FU
Table S1 Differential genes between sensitive and drug-resistant cells of 5-Fluorouraci
ID	logFC	logCPM	PValue	FDR
SLC1A2	9.85392	6.01281	1.7e-11	3.02e-07
EFS	6.77164	1.11918	2.64e-08	0.000168261
PNLDC1	7.51837	2.31061	2.85e-08	0.000168261
EMILIN1	5.76641	4.20734	5.79e-08	0.000234873
HEPACAM2	8.06369	3.35002	7.63e-08	0.000234873
INSM1	6.63377	2.30156	7.96e-08	0.000234873
HRASLS5	6.02996	0.673303	1.13e-07	0.000285752
ZNF536	7.6212	-0.309565	2.24e-07	0.000476776
MAB21L1	8.02656	3.49279	2.52e-07	0.000476776
GABRB2	6.93871	0.797431	2.69e-07	0.000476776
VWA5B1	7.95366	1.58245	3.5e-07	0.000563767
FOXR1	6.98769	-1.05481	5.99e-07	0.000875394
RHOXF2	9.43092	1.68713	6.67e-07	0.000875394
WDR11	3.42326	8.69438	6.92e-07	0.000875394
ZIC3	10.1816	0.337031	7.52e-07	0.000887512
ADAMTS12	-9.65397	6.68638	1.08e-06	0.00114505
SOX14	9.51763	-1.87004	1.16e-06	0.00114505
RHOXF2B	10.3756	1.71389	1.21e-06	0.00114505
NRN1	5.56552	1.44647	1.25e-06	0.00114505
TMEM119	8.64285	3.469	1.34e-06	0.00114505
B3GNT6	6.73867	0.596418	1.36e-06	0.00114505
LRRN1	5.25945	0.219158	1.44e-06	0.00115659
FABP2	7.48224	1.44817	1.51e-06	0.00115969
TSHZ3	5.19667	-1.93357	1.77e-06	0.0012814
GLDC	-7.30151	5.24793	1.81e-06	0.0012814
CACNB2	4.11586	2.38337	2.07e-06	0.0014087
ATOH1	7.50484	1.15428	2.19e-06	0.00143849
COL4A6	-6.58238	3.77569	2.91e-06	0.00182723
OLR1	-8.629	4.85564	3.03e-06	0.00182723
TDGF1	5.81261	-0.461399	3.09e-06	0.00182723
TMEM132E	6.19442	-0.10087	3.49e-06	0.00193682
APIP	2.94478	6.37656	3.5e-06	0.00193682
GRIN3A	4.77341	2.55183	3.71e-06	0.00199333
NETO1	5.91548	-0.849226	4.39e-06	0.00222892
CHODL	7.21886	3.32687	4.48e-06	0.00222892
PPP1R3A	10.3203	2.28527	4.53e-06	0.00222892
FN1	-6.94038	10.695	4.69e-06	0.00224656
AMBN	8.21199	0.33197	4.96e-06	0.00231245
LHX9	6.60207	4.87812	5.95e-06	0.00267997
FBLN2	-9.99617	6.69093	6.05e-06	0.00267997
PDHX	2.56477	7.11504	6.55e-06	0.00282938
SERPINA1	-9.17715	9.06518	7.43e-06	0.00313286
ARHGAP6	5.76763	2.41486	9.42e-06	0.00387814
MS4A7	7.97398	-0.0618568	9.73e-06	0.00387814
FAM69C	5.74469	-1.44243	9.85e-06	0.00387814
PAX7	5.17137	-1.34148	1.14e-05	0.00438024
PAX1	6.91778	-1.8959	1.34e-05	0.00503903
OBP2B	6.73198	0.118857	1.4e-05	0.00518074
CACNA1G	4.61413	2.89827	1.54e-05	0.00547881
MEP1B	5.20773	0.161109	1.55e-05	0.00547881
NRK	-9.9771	3.85766	1.6e-05	0.00547881
OGN	4.94201	0.557019	1.61e-05	0.00547881
TRIM51GP	10.6596	0.0198215	1.77e-05	0.00592765
LHX8	7.57028	1.04641	1.92e-05	0.00628263
LIN28A	-9.6101	4.60591	2.07e-05	0.00659819
FGG	-7.88102	3.89649	2.09e-05	0.00659819
VCAN	-7.78743	7.56767	2.13e-05	0.00660737
ASTN1	6.07494	-1.41807	2.23e-05	0.00682071
NEUROG3	6.30792	-1.19082	2.32e-05	0.0068631
ATP2B3	4.94406	0.988234	2.32e-05	0.0068631
RFX6	6.04748	-0.227441	2.51e-05	0.00728701
DNAH12	4.54349	1.45264	2.59e-05	0.00740777
COL4A4	-6.12076	3.79868	2.85e-05	0.00800506
GRIK3	4.47855	0.380171	2.98e-05	0.00802851
DYSF	-6.27073	3.75634	2.98e-05	0.00802851
FLG	-6.14749	4.32043	3.04e-05	0.00802851
ITIH2	-9.31293	4.44651	3.04e-05	0.00802851
APOA1	-9.90334	7.16236	3.1e-05	0.00802851
SOX11	4.85415	-0.630599	3.13e-05	0.00802851
HEG1	-4.28416	6.44409	3.2e-05	0.0081087
ST3GAL4	2.52939	6.12498	3.29e-05	0.00820382
PRAC1	7.49533	-0.169009	3.43e-05	0.00843441
POTED	7.48312	-3.02739	3.54e-05	0.00858015
MS4A14	7.29099	-0.407387	3.63e-05	0.0086795
AKT3	-5.93947	4.22457	3.72e-05	0.00878026
DSEL	-8.43108	4.4117	3.95e-05	0.00917947
PLAT	-6.28258	5.78054	3.99e-05	0.00917947
LRRN3	4.61501	0.78786	4.07e-05	0.00923996
RBP1	-6.74215	3.59789	4.22e-05	0.00945967
SLAMF7	-6.96436	1.72885	4.46e-05	0.00988183
PTGER3	4.37912	-0.302407	4.59e-05	0.0100419
THBS1	-5.40322	8.20038	4.66e-05	0.0100694
COL2A1	-9.17315	5.90553	4.76e-05	0.0101557
APOB	-10.8375	8.4165	4.97e-05	0.0104121
DIO3	-9.35276	4.68984	5e-05	0.0104121
SERPINF2	-8.04724	7.01045	5.17e-05	0.0105916
CALN1	6.18823	1.18666	5.2e-05	0.0105916
MGAM2	4.78855	4.81332	5.32e-05	0.0106094
EVX2	5.93675	-0.600585	5.38e-05	0.0106094
B3GALT1	-9.18161	1.50854	5.39e-05	0.0106094
PPP2R3A	-3.45528	4.46817	6.01e-05	0.0116235
CST6	-7.08678	2.96447	6.09e-05	0.0116235
EXOC3L1	3.48289	0.461464	6.1e-05	0.0116235
LCP1	-5.39174	6.24155	6.39e-05	0.011861
TF	-8.4438	4.98705	6.39e-05	0.011861
IGF2	-8.05993	9.25607	6.49e-05	0.011861
PCDHB5	-6.21124	2.69568	6.5e-05	0.011861
CXCL14	-7.84379	4.15228	6.79e-05	0.0119152
CHGA	4.45522	1.72318	6.83e-05	0.0119152
CHST5	4.19612	1.84709	6.84e-05	0.0119152
BMP10	-11.3355	4.32166	6.88e-05	0.0119152
KRT81	-7.64273	6.95563	6.88e-05	0.0119152
AHSG	-9.59011	6.0081	6.93e-05	0.0119152
AOX1	-5.62882	2.94731	7.06e-05	0.0119453
A2ML1	-8.6051	4.63944	7.11e-05	0.0119453
CYR61	-3.44189	6.73086	7.15e-05	0.0119453
OSR1	4.6728	4.74308	7.46e-05	0.0123453
CHI3L1	-6.7277	2.44247	7.61e-05	0.0123938
COL4A3	-6.64975	2.19463	7.67e-05	0.0123938
KISS1	-7.47727	4.28233	7.7e-05	0.0123938
ITGA4	4.914	2.81993	7.85e-05	0.0125193
DOK6	4.48286	-0.16713	8.35e-05	0.0131513
FOXG1	4.55859	0.187217	8.39e-05	0.0131513
FAM110B	-6.29974	1.26575	8.59e-05	0.0132166
FGFR2	4.42616	9.502	8.63e-05	0.0132166
AGT	-8.11867	5.74818	8.66e-05	0.0132166
RGS4	-6.03932	3.23325	9.42e-05	0.0141392
ADAMTS4	4.23812	0.541411	9.42e-05	0.0141392
GALNT17	5.08987	-2.78657	9.6e-05	0.0142959
SERPINA6	-9.04982	3.458	9.77e-05	0.0144183
CP	4.33173	2.09485	9.93e-05	0.0145203
IL1A	-7.6753	5.93896	0.000100016	0.0145203
PEG3	-8.79924	5.20094	0.000103661	0.0147696
HGF	-8.11963	5.66943	0.00010394	0.0147696
SERPING1	-6.93462	4.77778	0.000104235	0.0147696
TMIGD1	8.83664	1.15485	0.000108071	0.0151916
NRIP3	-6.38136	3.49512	0.000109156	0.0152234
GALNT8	4.55516	0.247323	0.000110048	0.0152279
APCDD1L	-7.29625	2.34388	0.000113779	0.0156221
COL8A1	-7.63207	5.38781	0.000115438	0.0157021
PPEF1	4.30386	-1.65843	0.000116134	0.0157021
CHST13	-5.35476	2.0976	0.000118469	0.0158964
RNF150	5.05695	1.98161	0.000123501	0.016447
SCN4A	3.64988	0.992134	0.000126461	0.0167155
SP8	5.11313	0.319741	0.000129267	0.0169598
TMEM200A	-7.9039	3.39611	0.000130807	0.0170357
RNF182	-6.59454	2.84403	0.000132416	0.0171193
SFRP5	-7.0577	2.32643	0.000136266	0.0174019
ILDR2	-4.66009	1.30392	0.000136567	0.0174019
ARMCX1	-6.29434	1.89799	0.000143009	0.0180358
IZUMO3	7.13436	-3.03071	0.000143578	0.0180358
CYP24A1	-6.33864	4.55022	0.000145761	0.0181812
APOA2	-11.0415	6.09588	0.000152949	0.0189443
ESM1	-9.31026	4.64598	0.0001561	0.0190781
PSCA	3.9649	3.22384	0.000156184	0.0190781
ATP2B2	-7.02147	2.55579	0.000158502	0.0192206
TRIML2	-8.03563	2.34808	0.00015952	0.0192206
TDRD9	-6.32197	3.11414	0.00016589	0.0197104
FXYD4	5.45721	-0.318348	0.00016617	0.0197104
SYNDIG1	4.57741	-1.66672	0.000166924	0.0197104
INHBA	-7.56721	6.94055	0.000171196	0.0198824
SPAG17	-7.16408	1.23788	0.000172582	0.0198824
SLC2A14	-6.15471	0.273602	0.000172631	0.0198824
PAX4	5.7851	-2.8587	0.000173942	0.0198824
COL16A1	3.58763	3.98876	0.000176006	0.0198824
FFAR2	4.26699	-1.60921	0.000176921	0.0198824
TMEM40	-6.12688	2.72715	0.000177104	0.0198824
NPBWR1	-5.58247	-2.13197	0.000179459	0.0198824
IVL	-8.12762	2.65754	0.000180241	0.0198824
BASP1	-5.64541	4.056	0.000180336	0.0198824
UNC93A	5.97743	3.71253	0.000181715	0.0198824
HYDIN	4.12885	2.18557	0.000181851	0.0198824
KLB	-6.52766	4.37269	0.000183134	0.0198998
TDRD12	-6.74818	3.14753	0.000189186	0.0204321
CNTNAP4	-8.58008	0.654305	0.000195953	0.0208755
MUC5B	4.62046	7.19022	0.000196168	0.0208755
TMPRSS11E	-6.0115	0.720696	0.000196827	0.0208755
TEKT2	3.70471	-0.672447	0.000199814	0.0208819
LGI2	-7.90184	4.27463	0.000199895	0.0208819
DTNA	-6.72071	3.76732	0.000200425	0.0208819
RNF212	-6.82109	0.977054	0.000205358	0.0212243
SERPINE1	-5.83502	7.31267	0.000206108	0.0212243
MSR1	-8.06284	2.19988	0.000210775	0.0215795
FAM155A	-6.4104	1.67493	0.000215159	0.0219017
SOAT2	-6.6901	1.76159	0.000222217	0.022461
DEUP1	5.47109	-0.0434867	0.00022319	0.022461
MAMDC2	-5.90301	1.91249	0.000224659	0.0224811
KCNJ16	-9.73741	2.78635	0.000227859	0.0226733
BCAS1	3.75661	3.71141	0.000230212	0.0227795
ODAPH	-6.01318	-0.711366	0.000236788	0.0231142
VTN	-6.39005	5.24553	0.00023723	0.0231142
UPK2	-5.96456	3.15908	0.000238273	0.0231142
DLGAP1	3.7739	0.230017	0.000238816	0.0231142
MYO18B	-6.65005	1.49009	0.000240335	0.0231349
NPY1R	-7.16882	3.0267	0.000249834	0.0239192
KBTBD12	4.76039	0.886912	0.000252265	0.0240221
S100A9	-6.15284	3.68159	0.000253706	0.0240302
PXDN	3.50346	2.60633	0.000256111	0.0241289
NLRP7	-5.8384	1.10697	0.000258071	0.0241361
ADAM19	-4.39789	3.92876	0.000258913	0.0241361
TGM5	-8.08562	0.940913	0.000262262	0.0243048
STARD8	-5.03969	2.84603	0.000263466	0.0243048
PRR9	-7.04178	0.306053	0.000266214	0.024431
TFF1	4.17894	4.01066	0.000274014	0.0247919
EDNRB	-5.89544	2.58705	0.000275309	0.0247919
GBGT1	-5.2482	0.353493	0.000276558	0.0247919
SPOCK1	-5.47561	4.78321	0.000276591	0.0247919
P2RY6	-4.68305	1.16754	0.000277609	0.0247919
BEX1	-7.27855	3.99447	0.000278545	0.0247919
SPDEF	4.02183	3.83455	0.000280642	0.0248536
CDH10	4.57831	0.0640443	0.00028621	0.0251617
SHROOM4	-5.53529	1.1453	0.000287327	0.0251617
AFP	-9.70261	9.25792	0.000288382	0.0251617
GREM1	3.29555	-0.0866526	0.00029051	0.0252231
KNG1	-9.3079	4.20844	0.000293324	0.0253432
RCOR2	2.94537	3.50685	0.00029502	0.025366
PAX3	5.03173	-0.611829	0.000302616	0.0258934
RUNX1T1	4.79557	0.0208807	0.000306841	0.0260665
POPDC3	-6.60994	1.72937	0.000307582	0.0260665
HAPLN4	-5.80873	0.142653	0.00031079	0.0262129
ATP6V0A4	-5.61289	2.82446	0.000318806	0.0267616
EMILIN3	-6.51999	1.6613	0.000320333	0.0267629
HSD3B1	-11.3398	5.07332	0.000324851	0.0270129
SORCS2	-5.2954	2.0238	0.000328892	0.027156
KRT34	-7.834	2.80117	0.000329637	0.027156
TACR1	-5.61081	0.800693	0.000342222	0.0280319
BEX4	-6.60114	2.71591	0.000344374	0.0280319
ADAMTS16	-6.44695	0.881138	0.000345878	0.0280319
ASGR2	-9.4413	3.80177	0.000347797	0.0280319
LIX1	5.50391	1.72135	0.000348183	0.0280319
PDCD1LG2	-7.79098	1.83137	0.000354063	0.0283763
PSG2	-8.57773	0.11391	0.000360106	0.0285095
MATK	4.39837	3.28384	0.000360146	0.0285095
KCNB1	-5.43254	1.31025	0.000360554	0.0285095
TFEC	-5.82606	1.41087	0.000363726	0.0286325
BRINP3	5.94341	1.09372	0.000374829	0.0293759
PSG11	-8.0244	0.719782	0.000376512	0.0293779
NCF2	-4.08805	2.26395	0.000379148	0.0294296
PASD1	-8.60014	3.6336	0.000380498	0.0294296
CLEC2L	-7.51855	1.2627	0.000382993	0.0294938
NELL2	4.64799	4.9723	0.000385762	0.0295784
DNAJC12	3.16885	0.67053	0.00039213	0.0298638
HELT	5.18583	-3.98958	0.000392856	0.0298638
DACH2	5.80976	-0.792524	0.000398662	0.0301756
ALPP	-6.24541	7.19408	0.000402793	0.0303586
DRGX	-8.02497	0.606919	0.000417169	0.0310766
MAPK4	-5.77667	1.5717	0.000417544	0.0310766
CHI3L2	-6.48569	3.37712	0.000417751	0.0310766
ARMCX2	-6.41852	2.85722	0.000419337	0.0310766
F2	-7.14035	3.7322	0.000422701	0.0311953
IL1B	-6.63353	5.60549	0.000425241	0.0312525
RPH3A	3.87534	-1.77322	0.000432354	0.0316441
PIPOX	-5.22808	2.69946	0.000441157	0.0319249
DMRTB1	-9.84534	4.21574	0.000443382	0.0319249
EFEMP1	-5.53645	4.65802	0.000446614	0.0319249
STMN3	2.68407	6.12552	0.000447569	0.0319249
MMP9	-6.88582	1.22045	0.00044827	0.0319249
SECTM1	2.64011	3.84973	0.000448721	0.0319249
TTR	-11.9463	6.42272	0.000448808	0.0319249
TMEM151A	3.63105	1.94843	0.000451384	0.0319796
ADAMTS18	-7.85019	1.23885	0.000454898	0.0321002
ITIH3	-7.65396	1.09182	0.000459835	0.0323198
DAND5	3.53755	0.0851947	0.000462078	0.0323491
CSMD3	5.2232	1.67893	0.000465099	0.0323502
GDNF	-6.82857	0.261371	0.000465746	0.0323502
TLR2	-5.43141	2.22938	0.00047572	0.0329139
APBB1IP	-5.99352	2.28554	0.000482434	0.0332485
CLSTN2	-5.77702	3.28683	0.000485268	0.0332801
FBN1	-4.18018	5.18926	0.000486649	0.0332801
FGF21	2.72957	-2.75579	0.00048929	0.0333319
CPNE4	4.69246	2.04568	0.000491513	0.0333551
NPPB	-7.55441	2.11859	0.00049932	0.0337556
SV2C	4.72497	-0.516593	0.000502383	0.0338335
PAH	-7.39617	5.02161	0.000508599	0.0341224
CNPY1	5.67909	-0.972825	0.000516784	0.0345407
TRPM3	5.34265	1.44524	0.00052373	0.034827
SPDYC	3.66373	-1.3488	0.000525001	0.034827
AQP1	-4.57243	5.03837	0.000528556	0.034932
SCUBE1	-5.54311	1.69349	0.000533046	0.0350978
CLDN19	-6.58596	1.38031	0.00053652	0.0351957
TSC22D3	2.76971	4.97558	0.000553735	0.0361055
MYL7	-8.25387	0.829203	0.000555548	0.0361055
PI3	-5.44832	2.41539	0.000556504	0.0361055
DSC1	4.4846	0.241203	0.000567649	0.0366942
GJB6	-6.89595	1.21524	0.000576599	0.0371372
FAM163A	-6.38297	0.511178	0.00058285	0.0372119
CASR	-8.22962	2.07806	0.000583716	0.0372119
CST5	-8.33799	-2.22377	0.000584062	0.0372119
WISP3	3.26591	0.469619	0.000600701	0.0380362
FPR3	-10.4874	4.62114	0.000601296	0.0380362
AGXT	-7.81524	2.36309	0.000614795	0.0386164
FILIP1L	-3.82809	4.38985	0.000614827	0.0386164
ROBO4	-5.87216	-0.225317	0.000623486	0.0390218
ERBB2	-3.27568	9.91217	0.000629392	0.0392528
SERPINC1	-7.20529	2.24832	0.00063551	0.0394953
FGF20	-9.25428	1.62245	0.000637854	0.0395023
NKAIN2	-6.77903	-0.327996	0.000650648	0.0401543
MYL9	-4.33768	5.00977	0.000664064	0.0408399
NR1H4	-7.56706	3.73588	0.000666634	0.0408561
TMEM200C	-7.36928	1.49776	0.000677137	0.0413567
TMEM156	-5.79231	1.59149	0.00068009	0.0413943
2020-03-04	-5.79344	3.37509	0.00068869	0.0417743
TSPYL6	-6.3555	-0.0180087	0.00071973	0.043508
ADGRA2	3.75541	3.75514	0.000722478	0.0435256
TNNT3	-9.86769	2.58174	0.000727326	0.0435441
SPOCK2	-4.30814	4.40761	0.000727701	0.0435441
CCDC178	4.71863	-2.11647	0.000733814	0.043762
UTRN	-1.93297	7.27443	0.000738644	0.0437692
TRHDE	-4.83071	2.49111	0.000738876	0.0437692
DOCK10	-5.32744	2.68256	0.000744024	0.0438481
GPD1L	1.49081	5.6423	0.000746463	0.0438481
SIRPG	-4.95145	-3.336	0.000747636	0.0438481
KRT6B	5.15496	3.67194	0.000761332	0.0442844
PHF24	-3.90223	-1.9475	0.000761634	0.0442844
LRRC3B	6.9058	-0.292641	0.000762576	0.0442844
SPP1	-4.54475	3.9518	0.000771902	0.0446795
POMC	-7.73298	0.312852	0.00078583	0.0451341
AADACL3	-7.57876	-0.767314	0.000785933	0.0451341
SLC7A10	-7.27249	2.00282	0.0007874	0.0451341
NUPR1	3.53023	5.10155	0.00079033	0.0451559
HP	-9.37812	2.28798	0.000801374	0.0456396
LY6G6D	4.41828	-1.38397	0.000804914	0.0456943
SYT10	-6.26347	-4.01485	0.000809425	0.0457189
UPK1A	-5.06588	-1.01755	0.000810509	0.0457189
ABAT	-2.94171	2.98885	0.000816008	0.045883
CNR1	-5.44688	1.56316	0.000834556	0.0467774
SLC16A12	-6.30646	0.634004	0.000859169	0.0479452
SUSD3	-5.32622	1.0352	0.000862434	0.0479452
CRP	-9.82701	1.85241	0.000863511	0.0479452
KCNJ2	-6.0102	2.4028	0.000873681	0.0479822
MEIOB	-5.75987	1.02502	0.000874419	0.0479822
TGM2	-4.25413	7.5536	0.000876397	0.0479822
TSPAN2	-4.83581	1.0224	0.000879865	0.0479822
RAB40A	-3.65513	-0.832184	0.000880216	0.0479822
OR8U1	5.95577	-4.74278	0.000880433	0.0479822
NKAIN4	-5.76627	0.553035	0.000883283	0.0479899
GSDMA	-6.99372	1.43558	0.000914485	0.0495332
SYT16	-7.63343	-0.226899	0.000921757	0.0497749

## Sheet: DEG-Ox
Table S1 Differential genes between sensitive and drug-resistant cells of Oxaliplatin
ID	logFC	logCPM	PValue	FDR
HGF	9.7423	6.02772	7.44e-17	1.32e-12
DMRTB1	11.4642	4.5747	1.62e-13	1.43e-09
FPR3	12.1886	4.96749	1.61e-12	9.51e-09
PAGE2B	9.73569	2.62044	2.43e-12	1.08e-08
MUC2	8.24336	6.4185	1.59e-10	5.64e-07
CST1	8.35849	5.43343	3.67e-10	1.08e-06
SULT1C4	10.8215	2.60865	8.92e-10	2.26e-06
PASD1	8.98291	2.5597	1.21e-09	2.68e-06
FTHL17	12.5838	1.36262	5.86e-09	1.15e-05
CACNA1E	6.52784	2.19423	1.22e-08	2.17e-05
ENTHD1	7.14294	-1.64944	1.65e-08	2.66e-05
RXFP1	6.95039	0.0950703	2.22e-08	3.27e-05
NOTCH4	5.51337	2.66198	9.36e-08	0.000127429
HBB	7.67724	0.0836564	1.22e-07	0.000136213
PIPOX	5.923	3.02993	1.27e-07	0.000136213
FOXR1	7.62461	-0.752656	1.3e-07	0.000136213
REC114	7.30438	-0.00595867	1.31e-07	0.000136213
PPDPFL	10.0745	-0.926306	1.86e-07	0.000178167
PIGR	7.89682	7.2061	1.91e-07	0.000178167
FZD10	7.50754	-1.39296	2.84e-07	0.000251452
ALOX15B	6.59461	1.09075	3.94e-07	0.000332117
VTN	6.17696	4.32974	4.13e-07	0.000332117
GPX5	9.9796	-1.18543	4.6e-07	0.000353792
TMEM213	8.78108	2.35854	4.92e-07	0.000362928
CSH2	6.36952	-3.14995	1.04e-06	0.000739164
RGS8	6.0204	-2.9476	1.17e-06	0.000798109
ATP6V0A4	5.81533	3.02615	1.27e-06	0.000832421
PSG11	7.42511	1.05111	1.4e-06	0.000886038
UNC5CL	4.35242	3.94527	1.73e-06	0.00104153
OR7A5	7.82866	-1.17022	1.77e-06	0.00104153
SCUBE1	5.4054	1.0735	2.66e-06	0.00151629
AXDND1	4.66507	0.454675	3.04e-06	0.00168227
MT1A	6.9742	0.167908	4.02e-06	0.00212992
PAGE4	8.04384	1.70499	4.09e-06	0.00212992
HMCN2	5.02422	0.709563	4.28e-06	0.00216342
GRAP2	5.98823	0.195189	5.18e-06	0.00254879
MAGEB1	7.68411	-1.86933	5.81e-06	0.0027775
GPR31	6.75641	-3.74502	6.69e-06	0.00311569
PAGE1	6.73329	3.49712	9.23e-06	0.00418683
C5orf58	6.73882	-2.28728	1.02e-05	0.00451008
OR7C1	8.42713	-1.08005	1.04e-05	0.00451008
FABP4	5.583	-0.932679	1.38e-05	0.00582203
ZNF831	4.57265	-2.61939	1.46e-05	0.00598886
HOXB1	5.41642	-2.28236	1.63e-05	0.00654149
TEKT2	4.65458	-0.58655	1.72e-05	0.0067491
NPY1R	6.09159	3.38107	1.78e-05	0.0067491
TAGLN	3.65296	5.31009	1.79e-05	0.0067491
DEUP1	6.81177	0.272901	1.83e-05	0.0067491
NTM	5.46345	-0.917636	2.04e-05	0.00738187
SULT1C2	5.50804	3.8144	2.12e-05	0.00749356
SV2B	4.295	-1.82925	2.17e-05	0.00754618
NPY5R	6.89669	-1.33112	2.51e-05	0.00852902
NOX1	3.83823	-0.135204	3.34e-05	0.0111452
SMC1B	4.84659	1.14355	4.11e-05	0.0134788
PDGFC	-7.37953	5.34406	4.55e-05	0.0146487
FCGR3B	6.64388	-4.45034	4.71e-05	0.0148751
LEFTY1	4.04981	-1.46921	5.24e-05	0.0162598
HYDIN	4.8916	2.48975	5.51e-05	0.0168263
SLC28A2	6.11713	0.794367	6.23e-05	0.0186873
BHMG1	4.69439	-0.455778	6.96e-05	0.0205306
AKAP4	4.3381	-4.00352	7.34e-05	0.0213075
CDKN2A	-7.31414	4.98755	8.11e-05	0.0231562
PSG2	6.49197	0.209901	8.98e-05	0.0248877
ANKRD34C	5.39951	-2.20817	9e-05	0.0248877
PLA2G2A	5.34013	4.0787	9.72e-05	0.0260868
CPA6	6.7305	1.43646	9.73e-05	0.0260868
SMIM21	6.13794	-3.63722	0.000104805	0.0276841
AIF1	4.55478	-2.52412	0.000117783	0.0306548
C6orf118	6.61911	-1.98255	0.000127615	0.0327324
MROH2A	4.19367	0.405899	0.000136017	0.0342089
NLRP7	4.93967	1.4059	0.000137238	0.0342089
LHFPL3	5.31465	0.995656	0.000149697	0.0367965
PAGE2	5.27751	-2.93242	0.000158103	0.0383302
SOCS2	3.21696	4.63722	0.000163771	0.0391678
IGFL3	4.58661	-3.10937	0.000173128	0.0405828
LRMDA	4.58731	0.463202	0.000174274	0.0405828
POU3F1	4.85319	-1.05342	0.000181979	0.0418268
MST1	3.29245	3.20512	0.000185875	0.0421746
WNT16	4.7562	1.30715	0.000193835	0.0429217
WAS	3.75716	0.229524	0.000194018	0.0429217
HBD	5.97681	-4.27794	0.000217799	0.046804
SVOP	5.12442	-0.480867	0.000218832	0.046804
HMGCS2	4.77146	3.91068	0.000220759	0.046804
CXCL9	5.1939	-3.5127	0.000222146	0.046804
