# Supplementary material for: Identification of New Therapeutic Targets for Gastric Cancer With Bioinformatics
Source: Front Genet. 2020 Aug 18;11:865. doi: 10.3389/fgene.2020.00865 (PMC7461879; doi:10.3389/fgene.2020.00865)
Supplement: Supplementary file 2 [file Table_2.XLSX]

## Sheet: Sheet1
Table S2 Hub genes selection using 12 algorithms by cytohubba
Name	Betweenness	Order	Name	BottleNeck	Order	Name	Closeness	Order	Name	ClusteringCoefficient	Order	Name	Degree	Order	Name	DMNC	Order	Name	EcCentricity	Order	Name	EPC	Order	Name	MCC	Order	Name	MNC	Order	Name	Radiality	Order	Name	Stress	Order
FN1	14580.6	1	MMP9	40	1	FN1	153.083	1	NPBWR1	1	1	FN1	60	1	AMBN	1.02841	1	TF	0.1853	1	APOA2	137.636	1	APOA2	92200000000000	1	FN1	59	1	FN1	7.15887	1	FN1	75862	1
F2	11270.8	2	FN1	39	2	MMP9	146.3	2	NPY5R	1	2	KNG1	51	2	TF	0.96395	2	CP	0.1853	2	SERPINC1	137.636	2	SERPINC1	92200000000000	2	KNG1	51	2	MMP9	7.10116	2	MMP9	62470	2
MMP9	10004.4	3	F2	27	3	KNG1	144.617	3	HBD	1	3	MMP9	49	3	FBN1	0.95572	3	ITIH2	0.1853	3	SERPINA1	137.636	3	SERPINA1	92200000000000	3	MMP9	46	3	KNG1	7.03705	3	F2	60528	3
ERBB2	7452.06	4	ERBB2	26	4	F2	140.867	4	RBP1	1	4	F2	44	4	CP	0.94353	4	APOA2	0.1853	4	FGG	137.636	4	FGG	92200000000000	4	SPP1	39	4	F2	7.00819	4	ERBB2	38814	4
VCAN	6297.5	5	VCAN	18	5	SPP1	137.167	5	SOAT2	1	5	SPP1	39	5	CYR61	0.93829	5	SERPINC1	0.1853	5	AHSG	137.636	5	AHSG	92200000000000	5	APOB	39	5	AFP	6.97613	5	VCAN	37158	5
KNG1	5004.83	6	KNG1	18	6	AFP	136.6	6	ADAMTS18	1	6	APOB	39	6	GPR31	0.93324	6	TTR	0.1853	6	VTN	137.636	6	APOA1	92200000000000	6	F2	39	6	SPP1	6.95369	6	KNG1	35572	6
IGF2	4822.28	7	PI3	12	7	AHSG	135.333	7	ADAMTS16	1	7	AHSG	38	7	NPY1R	0.93324	7	SERPING1	0.1853	7	SERPINE1	137.636	7	AFP	92200000000000	7	AHSG	37	7	AHSG	6.92163	7	IGF2	34738	7
SLC1A2	3997.12	8	AIF1	12	8	AGT	134.15	8	FLG	1	8	AGT	38	8	NPBWR1	0.93324	8	SERPINF2	0.1853	8	APOA1	137.636	8	SPP1	92200000000000	8	AGT	37	8	IGF2	6.91522	8	AFP	26158	8
PI3	3951.78	9	CRP	11	9	SERPINA1	133.75	9	LEFTY1	1	9	AFP	36	9	NPY5R	0.93324	9	SERPINA1	0.1853	9	AFP	137.636	9	APOB	92200000000000	9	AFP	36	9	SERPINA1	6.91201	9	AGT	25762	9
SPAG17	3660.83	10	IL1B	10	10	APOB	133.683	10	RFX6	1	10	CRP	36	10	ITIH2	0.88858	10	FGG	0.1853	10	F2	137.636	10	KNG1	92200000000000	10	SERPINA1	35	10	AGT	6.88957	10	APOB	24846	10
AFP	3560.45	11	SLC1A2	9	11	FGG	131.95	11	INSM1	1	11	SERPINA1	35	11	APOA2	0.88063	11	AHSG	0.1853	11	SPP1	137.636	11	FN1	92200000000000	11	APOA1	35	11	VTN	6.88316	11	CRP	23130	11
AGT	3532.38	12	SPAG17	9	12	IGF2	131.917	12	PAX4	1	12	APOA1	35	12	ITIH3	0.85126	12	VTN	0.1853	12	APOB	137.636	12	VCAN	92200000000000	12	CRP	35	12	FGG	6.87034	12	SLC1A2	19188	12
SV2B	3413.75	13	AFP	9	13	CRP	131.783	13	NTM	1	13	FGG	34	13	PTGER3	0.84883	13	KISS1	0.1853	13	KNG1	137.636	13	TF	92200000000000	13	FGG	34	13	APOB	6.86392	13	SPP1	19020	13
APOB	3254.27	14	PAX3	9	14	VCAN	131.283	14	NRN1	1	14	VCAN	32	14	SERPINC1	0.84544	14	PLAT	0.1853	14	THBS1	137.636	14	CP	92200000000000	14	SERPINC1	31	14	VCAN	6.86392	14	CACNA1G	18400	14
GDNF	2819.67	15	TLR2	9	15	VTN	131.133	15	LY6G6D	1	15	SERPINC1	31	15	SERPINA6	0.83801	15	SERPINE1	0.1853	15	AGT	137.636	15	ITIH2	92200000000000	15	HP	30	15	SERPINE1	6.85431	15	PAH	18304	15
ATP2B2	2780.5	16	CDKN2A	9	16	APOA1	130.35	16	GPD1L	1	16	VTN	31	16	FPR3	0.83419	16	APOA1	0.1853	16	CRP	137.636	16	FBN1	92200000000000	16	VTN	30	16	ERBB2	6.85431	16	ITIH3	17938	16
POMC	2778.71	17	OGN	8	17	SERPINE1	129.517	17	SYNDIG1	1	17	HP	30	17	TTR	0.83332	17	EDNRB	0.1853	17	FN1	137.636	17	CYR61	92200000000000	17	IGF2	30	17	THBS1	6.84789	17	IL1B	16978	17
GPR31	2763.77	18	CACNA1G	8	18	SERPINC1	128.6	18	SFRP5	1	18	IGF2	30	18	SERPING1	0.82418	18	HP	0.1853	18	MMP9	137.636	18	AMBN	92200000000000	18	VCAN	28	18	CRP	6.83828	18	AHSG	16964	18
CHGA	2747.67	19	THBS1	8	19	THBS1	128.25	19	FZD10	1	19	SERPINE1	29	19	CNR1	0.81956	19	AFP	0.1853	19	VCAN	137.636	19	F2	555000000000	19	SERPINE1	28	19	HGF	6.83507	19	CACNB2	16304	19
CRP	2705.98	20	IGF2	7	20	HGF	128.117	20	KRT6B	1	20	THBS1	28	20	SERPINF2	0.81677	20	F2	0.1853	20	IGF2	137.518	20	TTR	374000000000	20	THBS1	28	20	APOA1	6.82225	20	PI3	16080	20
IL1B	2622.51	21	APOB	7	21	ERBB2	128.033	21	KRT81	1	21	ITIH2	27	21	SERPINA1	0.81117	21	TACR1	0.1853	21	IL1B	137.518	21	AGT	268000000000	21	ITIH2	27	21	SERPINC1	6.81584	21	POMC	15958	21
OGN	2607.04	22	PSCA	7	22	IL1B	127.583	22	KRT34	1	22	CP	27	22	FGG	0.79733	22	SPP1	0.1853	22	TF	137.507	22	HP	193000000000	22	HGF	27	22	IL1B	6.81263	22	VTN	15880	22
PAX3	2599.87	23	MUC5B	7	23	HP	127.35	23	COL16A1	0.86667	23	APOA2	27	23	AHSG	0.78121	23	FFAR2	0.1853	23	CP	137.486	23	VTN	106000000000	23	APOA2	26	23	APOA2	6.80942	23	SV2B	15472	23
PSCA	2498.6	24	HGF	7	24	APOA2	126.817	24	FPR3	0.86364	24	HGF	27	24	PAH	0.78053	24	CASR	0.1853	24	ITIH2	137.387	24	CRP	13400000000	24	CP	26	24	ITIH2	6.79339	24	FBN1	15284	24
CACNA1G	2445.63	25	AGT	6	25	ITIH2	126.183	25	NPY1R	0.83333	25	IL1B	27	25	VTN	0.72745	25	APOB	0.1853	25	TTR	137.381	25	SERPINF2	113000000	25	IL1B	25	25	HP	6.78378	25	GPR31	14982	25
MUC5B	2394.7	26	SV2B	6	26	CP	125.55	26	P2RY6	0.83333	26	ERBB2	26	26	P2RY6	0.71599	26	KNG1	0.1853	26	HGF	137.374	26	SERPINE1	112000000	26	TF	24	26	CP	6.77095	26	GDNF	14640	26
FBN1	2335.54	27	ATP2B2	6	27	TTR	124.467	27	CHI3L1	0.83333	27	TF	25	27	KISS1	0.69834	27	THBS1	0.1853	27	FBN1	137.372	27	SERPING1	98500000	27	TTR	24	27	TTR	6.76775	27	TLR2	14610	27
MYL9	2240.11	28	GPR31	6	28	FBN1	124.217	28	AMBN	0.81871	28	TTR	25	28	PLAT	0.68693	28	AGT	0.1853	28	HP	137.363	28	THBS1	96900000	28	FBN1	22	28	TF	6.75813	28	PAX3	13844	28
TLR2	2102.67	29	CHGA	6	29	TF	124.217	29	HMGCS2	0.8	29	FBN1	25	29	SERPINE1	0.68627	29	CRP	0.1853	29	POMC	137.009	29	IGF2	96200000	29	TLR2	22	29	FBN1	6.74851	29	SPAG17	13740	29
AIF1	2098.15	30	FBN1	6	30	TLR2	122.583	30	ADAMTS12	0.8	30	POMC	23	30	APOA1	0.68309	30	IGF2	0.1853	30	CYR61	136.981	30	HGF	48400000	30	CYR61	21	30	TLR2	6.7421	30	THBS1	13686	30
