# Supplementary material for: Identification of New Therapeutic Targets for Gastric Cancer With Bioinformatics
Source: Front Genet. 2020 Aug 18;11:865. doi: 10.3389/fgene.2020.00865 (PMC7461879; doi:10.3389/fgene.2020.00865)
Supplement: Supplementary file 4 [file Table_4.XLSX]

## Sheet: P<0.05
Table S3 Co-occurrence and mutual exclusivity between target genes and 187 genes from 10 pathways
Target genes	Pathway genes	Pvalue	Relationship	log odd ratio	Pathway
HGF	CDK6	0.002	co-occurrence	2.8567	Cell cycle
FBN1	FAT1	0.017	co-occurrence	1.84021	HIPPO
FBN1	FAT4	0.004	co-occurrence	1.85002	HIPPO
FBN1	DCHS1	0.02	co-occurrence	1.98112	HIPPO
FBN1	LATS1	0.024	co-occurrence	2.20823	HIPPO
FBN1	CRB2	0.02	co-occurrence	2.30561	HIPPO
FBN1	TAOK2	0.02	co-occurrence	2.30561	HIPPO
FBN1	DCHS2	0.002	co-occurrence	2.37145	HIPPO
FBN1	CSNK1E	0.039	co-occurrence	2.49499	HIPPO
FBN1	TAOK3	0.023	co-occurrence	2.5032	HIPPO
FBN1	FAT3	0.001	co-occurrence	2.54793	HIPPO
FBN1	TEAD2	0.001	co-occurrence	2.89185	HIPPO
FBN1	LATS2	0.001	co-occurrence	3.09592	HIPPO
FN1	FAT4	0.002	co-occurrence	2.25638	HIPPO
FN1	WWC1	0.011	co-occurrence	2.7735	HIPPO
FN1	TEAD2	0.002	co-occurrence	2.81629	HIPPO
FN1	LATS1	0.005	co-occurrence	2.86212	HIPPO
FN1	FAT1	0.001	co-occurrence	2.86819	HIPPO
FN1	LATS2	0.003	co-occurrence	3.06301	HIPPO
FN1	DCHS1	0.001	co-occurrence	3.26626	HIPPO
FN1	FAT3	0.001	co-occurrence	3.31211	HIPPO
FN1	TAOK2	0.001	co-occurrence	3.32604	HIPPO
FBN1	FN1	0.004	co-occurrence	2.68634	Cell cycle
FBN1	FN1	0.002	co-occurrence	2.68634	HIPPO
FBN1	FN1	0.003	co-occurrence	2.68634	MYC
FBN1	FN1	0.002	co-occurrence	2.68634	NOTCH
FBN1	FN1	0.002	co-occurrence	2.68634	NRF2
FBN1	FN1	0.006	co-occurrence	2.68634	PI3K
FBN1	FN1	0.009	co-occurrence	2.68634	RTK-RAS
FBN1	FN1	0.002	co-occurrence	2.68634	TGF-β
FBN1	FN1	0.003	co-occurrence	2.68634	TP53
FBN1	FN1	0.01	co-occurrence	2.68634	WNT
FN1	CSNK1E	0.002	co-occurrence	3.60531	HIPPO
HGF	TAOK3	0.025	co-occurrence	2.67693	HIPPO
FBN1	VCAN	0.001	co-occurrence	2.84713	Cell cycle
FBN1	VCAN	0.001	co-occurrence	2.84713	HIPPO
FBN1	VCAN	0.001	co-occurrence	2.84713	MYC
FBN1	VCAN	0.001	co-occurrence	2.84713	NOTCH
FBN1	VCAN	0.001	co-occurrence	2.84713	NRF2
FBN1	VCAN	0.001	co-occurrence	2.84713	PI3K
FBN1	VCAN	0.001	co-occurrence	2.84713	RTK-RAS
FBN1	VCAN	0.001	co-occurrence	2.84713	TGF-β
FBN1	VCAN	0.001	co-occurrence	2.84713	TP53
FBN1	VCAN	0.001	co-occurrence	2.84713	WNT
HGF	MOB1B	0.027	co-occurrence	3.0915	HIPPO
MMP9	LATS1	0.027	co-occurrence	2.15957	HIPPO
MMP9	TEAD2	0.005	co-occurrence	2.32629	HIPPO
MMP9	TAOK1	0.01	co-occurrence	2.92795	HIPPO
MMP9	CSNK1D	0.011	co-occurrence	3.31366	HIPPO
MMP9	STK4	0.001	co-occurrence	6.06337	HIPPO
THBS1	TAOK2	0.003	co-occurrence	3.36834	HIPPO
VCAN	FAT4	0.01	co-occurrence	1.7137	HIPPO
VCAN	DCHS2	0.011	co-occurrence	2.06774	HIPPO
FN1	VCAN	0.042	co-occurrence	1.94937	HIPPO
VCAN	TAOK2	0.048	co-occurrence	2.0917	HIPPO
VCAN	TEAD2	0.003	co-occurrence	2.55007	HIPPO
VCAN	TAOK1	0.028	co-occurrence	2.64075	HIPPO
VCAN	DCHS1	0.001	co-occurrence	2.67572	HIPPO
VCAN	LATS1	0.001	co-occurrence	3.02975	HIPPO
VCAN	CSNK1E	0.006	co-occurrence	3.12516	HIPPO
FBN1	MGA	0.003	co-occurrence	2.60404	MYC
FN1	MGA	0.002	co-occurrence	3.03052	MYC
VCAN	MGA	0.007	co-occurrence	2.48971	MYC
FBN1	NCOR1	0.044	co-occurrence	1.74935	NOTCH
FBN1	NOTCH1	0.014	co-occurrence	2.06221	NOTCH
FBN1	CNTN6	0.004	co-occurrence	2.14296	NOTCH
FBN1	CUL1	0.019	co-occurrence	2.18589	NOTCH
FBN1	THBS2	0.019	co-occurrence	2.18589	NOTCH
FBN1	NOTCH4	0.004	co-occurrence	2.37016	NOTCH
FN1	FBN1	0.004	co-occurrence	2.68634	Cell cycle
FN1	FBN1	0.002	co-occurrence	2.68634	HIPPO
FN1	FBN1	0.003	co-occurrence	2.68634	MYC
FN1	FBN1	0.002	co-occurrence	2.68634	NOTCH
FN1	FBN1	0.002	co-occurrence	2.68634	NRF2
FN1	FBN1	0.006	co-occurrence	2.68634	PI3K
FN1	FBN1	0.009	co-occurrence	2.68634	RTK-RAS
FN1	FBN1	0.002	co-occurrence	2.68634	TGF-β
FN1	FBN1	0.003	co-occurrence	2.68634	TP53
FN1	FBN1	0.01	co-occurrence	2.68634	WNT
FBN1	CREBBP	0.001	co-occurrence	2.70312	NOTCH
FBN1	SPEN	0.001	co-occurrence	2.76176	NOTCH
FBN1	NCOR2	0.001	co-occurrence	3.01062	NOTCH
FN1	NCOR2	0.018	co-occurrence	2.21241	NOTCH
FN1	NOTCH1	0.018	co-occurrence	2.21241	NOTCH
FN1	NOTCH3	0.041	co-occurrence	2.23406	NOTCH
FN1	FBXW7	0.007	co-occurrence	2.40312	NOTCH
FN1	CNTN6	0.003	co-occurrence	2.47719	NOTCH
FN1	CUL1	0.014	co-occurrence	2.52356	NOTCH
FN1	SPEN	0.003	co-occurrence	2.58151	NOTCH
FN1	EP300	0.012	co-occurrence	2.60174	NOTCH
FN1	KDM5A	0.003	co-occurrence	2.75066	NOTCH
FN1	CREBBP	0.001	co-occurrence	3.12419	NOTCH
FN1	DNER	0.004	co-occurrence	3.43134	NOTCH
MMP9	NOTCH2	0.014	co-occurrence	1.87193	NOTCH
MMP9	CUL1	0.007	co-occurrence	2.43382	NOTCH
THBS1	SPEN	0.004	co-occurrence	2.9098	NOTCH
THBS1	NOTCH3	0.002	co-occurrence	3.44614	NOTCH
VCAN	NOTCH1	0.023	co-occurrence	1.96963	NOTCH
FBN1	CUL3	0.008	co-occurrence	3.68568	NRF2
FN1	CUL3	0.018	co-occurrence	3.58496	NRF2
FBN1	RPTOR	0.009	co-occurrence	2.66391	PI3K
FBN1	MTOR	0.001	co-occurrence	2.97016	PI3K
FN1	RICTOR	0.042	co-occurrence	2.02722	PI3K
MMP9	VCAN	0.03	co-occurrence	1.80957	HIPPO
MMP9	VCAN	0.038	co-occurrence	1.80957	NOTCH
MMP9	VCAN	0.041	co-occurrence	1.80957	NRF2
MMP9	VCAN	0.041	co-occurrence	1.80957	TGF-β
MMP9	VCAN	0.047	co-occurrence	1.80957	TP53
FN1	PIK3CB	0.048	co-occurrence	2.48101	PI3K
FN1	MTOR	0.018	co-occurrence	2.57236	PI3K
MMP9	MTOR	0.011	co-occurrence	2.39776	PI3K
MMP9	AKT2	0.021	co-occurrence	2.72138	PI3K
VCAN	MTOR	0.006	co-occurrence	2.62149	PI3K
FBN1	ERBB3	0.021	co-occurrence	2.09889	RTK-RAS
FBN1	IGF1R	0.032	co-occurrence	2.24531	RTK-RAS
FBN1	NF1	0.005	co-occurrence	2.61143	RTK-RAS
FBN1	PDGFRB	0.044	co-occurrence	2.9752	RTK-RAS
FBN1	PLXNB1	0.002	co-occurrence	3.05296	RTK-RAS
FN1	IGF1R	0.016	co-occurrence	2.68753	RTK-RAS
FN1	ERBB3	0.005	co-occurrence	2.69018	RTK-RAS
FN1	BRAF	0.032	co-occurrence	2.77052	RTK-RAS
FN1	ARAF	0.028	co-occurrence	3.1337	RTK-RAS
THBS1	FGFR4	0.016	co-occurrence	3.46547	RTK-RAS
THBS1	CBL	0.044	co-occurrence	3.80539	RTK-RAS
FBN1	ACVR2A	0.001	co-occurrence	3.19509	TGF-β
VCAN	MMP9	0.03	co-occurrence	1.80957	HIPPO
VCAN	MMP9	0.038	co-occurrence	1.80957	NOTCH
VCAN	MMP9	0.041	co-occurrence	1.80957	NRF2
VCAN	MMP9	0.041	co-occurrence	1.80957	TGF-β
VCAN	MMP9	0.047	co-occurrence	1.80957	TP53
VCAN	FN1	0.042	co-occurrence	1.94937	HIPPO
FN1	ACVR2A	0.001	co-occurrence	2.51693	TGF-β
FN1	TGFBR2	0.013	co-occurrence	2.52356	TGF-β
FN1	SMAD3	0.038	co-occurrence	3.0915	TGF-β
THBS1	ACVR2A	0.01	co-occurrence	2.47847	TGF-β
VCAN	ACVR2A	0.004	co-occurrence	2.06946	TGF-β
FBN1	ATM	0.004	co-occurrence	2.23447	TP53
FN1	CHEK2	0.015	co-occurrence	3.10417	TP53
HGF	ATM	0.008	co-occurrence	2.3001	TP53
MMP9	ATM	0.011	co-occurrence	1.96121	TP53
VCAN	ATM	0.005	co-occurrence	2.20163	TP53
FBN1	AMER1	0.001	co-occurrence	3.54326	WNT
VCAN	FBN1	0.001	co-occurrence	2.84713	Cell cycle
VCAN	FBN1	0.001	co-occurrence	2.84713	HIPPO
VCAN	FBN1	0.001	co-occurrence	2.84713	MYC
VCAN	FBN1	0.001	co-occurrence	2.84713	NOTCH
VCAN	FBN1	0.001	co-occurrence	2.84713	NRF2
VCAN	FBN1	0.001	co-occurrence	2.84713	PI3K
VCAN	FBN1	0.001	co-occurrence	2.84713	RTK-RAS
VCAN	FBN1	0.001	co-occurrence	2.84713	TGF-β
VCAN	FBN1	0.001	co-occurrence	2.84713	TP53
VCAN	FBN1	0.001	co-occurrence	2.84713	WNT
FN1	AMER1	0.043	co-occurrence	2.6839	WNT
VCAN	APC	0.016	co-occurrence	2.10513	WNT
